# Supplementary material for: Chronic Fatigue and Dysautonomia following COVID-19 Vaccination Is Distinguished from Normal Vaccination Response by Altered Blood Markers
Source: MDPI journal article supplement (doi:10.3390/vaccines11111642), 2023-10-26
Supplement: s1 [file s1]

**Table S1: Vaccination History of Participants**

|                                                | <i>N</i> |
|------------------------------------------------|----------|
| <b>mRNA Vaccination preceeding PACVS Onset</b> |          |
| Moderna (SpikeVax)                             | 32       |
| BioNTech (Comirnaty)                           | 159      |
| <b>Vaccination Cycles before PACVS Onset</b>   |          |
| 1 cycle                                        | 47       |
| 2 cycles                                       | 96       |
| 3 cycles                                       | 48       |
| <b>Vaccination Regimen before PACVS Onset</b>  |          |
| 1x BioNTech                                    | 41       |
| 2x BioNTech                                    | 72       |
| 3x BioNTech                                    | 27       |
| 1x Moderna                                     | 6        |
| 2x Moderna                                     | 11       |
| 3x Moderna                                     | 6        |
| Moderna/ BioNTech                              | 1        |
| 2x BioNTech/ Moderna                           | 8        |
| 2x Moderna/ BioNTech                           | 2        |
| Astra-Zeneca/ BioNTech                         | 7        |
| Astra-Zeneca/ Moderna                          | 1        |
| Astra-Zeneca/ 2x BioNTech                      | 5        |
| Janssen/ BioNTech                              | 3        |
| Janssen/ Moderna                               | 1        |

**Table S2: Meta Data and In-/Exclusion Criteria of Controls and PACVS Subjects**

|               |                                                                                                                                                                                                                                                                                                                                                                                                                                                                                                                                                                                                                                                                                                                                                                                                                                                                                                                                                                                                                                                                                                                                                                                                                                                                                                                                                                                                                                                                                                                                                                                                                                                                                                                                      |
|---------------|--------------------------------------------------------------------------------------------------------------------------------------------------------------------------------------------------------------------------------------------------------------------------------------------------------------------------------------------------------------------------------------------------------------------------------------------------------------------------------------------------------------------------------------------------------------------------------------------------------------------------------------------------------------------------------------------------------------------------------------------------------------------------------------------------------------------------------------------------------------------------------------------------------------------------------------------------------------------------------------------------------------------------------------------------------------------------------------------------------------------------------------------------------------------------------------------------------------------------------------------------------------------------------------------------------------------------------------------------------------------------------------------------------------------------------------------------------------------------------------------------------------------------------------------------------------------------------------------------------------------------------------------------------------------------------------------------------------------------------------|
| Controls      | $N = 89$ , Gender: 71 female, 18 male ( $p < 0.001$ )<br>Age (years, range/mean/median): 21 - 64, 39/49 ( $p < 0.0001$ )                                                                                                                                                                                                                                                                                                                                                                                                                                                                                                                                                                                                                                                                                                                                                                                                                                                                                                                                                                                                                                                                                                                                                                                                                                                                                                                                                                                                                                                                                                                                                                                                             |
|               | Inclusion:<br>Initial dual vaccination with Spikevax (Moderna), spaced six weeks<br>Monitoring period: six months after second vaccination<br>Donation of serum sample 48 h before first and 6 months after second vaccination                                                                                                                                                                                                                                                                                                                                                                                                                                                                                                                                                                                                                                                                                                                                                                                                                                                                                                                                                                                                                                                                                                                                                                                                                                                                                                                                                                                                                                                                                                       |
|               | Exclusion:<br>De novo disease symptoms during monitoring period:<br><ul style="list-style-type: none"> <li>- Immunological/ rheumatological disorders (myalgia, RBV-reactivation, inflammation, arthritis)</li> <li>- Cardiovascular disorder (pressure crisis, heart insufficiency, arrhythmia, sinus tachycardia, ischemia)</li> <li>- Neurologic disorder (cognitive impairment, peripheral nerve dysfunction, muscular fibrillation or paresis)</li> <li>- Other disease or health condition entailing occupational impairment</li> </ul> Increased laboratory markers in post-vaccination serum:<br><ul style="list-style-type: none"> <li>- IL-6 <math>&gt; 7</math> pg/ml, CRP <math>&gt; 0.5</math> mg/dl, pBNP <math>&gt; 125</math> pg/ml, TpT <math>&gt; 11</math> ng/ml, IgG <math>&lt; 700</math>, <math>&gt; 1600</math> mg/dL</li> <li>- SARS-CoV-2 nucleocapsid antibodies indicative of passed SARS-CoV-2 infection</li> </ul>                                                                                                                                                                                                                                                                                                                                                                                                                                                                                                                                                                                                                                                                                                                                                                                      |
| Participants. | $N = 191$ , Gender: 159 females, 32 males ( $p < 0.001$ )<br>Age (years, range, mean/median): 18 - 66, 40/39 years ( $p < 0.0001$ )                                                                                                                                                                                                                                                                                                                                                                                                                                                                                                                                                                                                                                                                                                                                                                                                                                                                                                                                                                                                                                                                                                                                                                                                                                                                                                                                                                                                                                                                                                                                                                                                  |
|               | Inclusion:<br>Development of symptoms or disease after SARS-CoV-2 vaccination with mRNA-vaccine (Moderna or Pfizer/BioNTech)<br>Established or suspected diagnosis of syndrome or $\geq 3$ symptoms thereof <sup>1</sup><br>Start of symptoms $\geq 1$ week after first and/or $\leq 4$ weeks after last vaccination<br>Persistent symptoms for $\geq 5$ months<br>Completion of on-line query<br>Donation of serum sample at $\geq 5$ months after onset of symptoms<br><br>Diseases/ syndromes (only included if occurring/diagnosed <sup>1</sup> after SARS-CoV-2 vaccination):<br><ul style="list-style-type: none"> <li>- Myalgic Encephalomyelitis/Chronic Fatigue Syndrome (ME/CFS)</li> <li>- Post-Covid-19/long Covid-19 syndrome in the absence of SARS-CoV-2-infection</li> <li>- Post vaccination syndrome</li> <li>- Postural Tachycardia Syndrome (POTS)</li> <li>- Mastcell activation syndrome (MCAS)</li> <li>- Fibromyalgia/chronic pain syndrome</li> <li>- Peri-/Myocarditis</li> <li>- Thrombosis</li> <li>- Small fiber neuropathy (SFN)</li> <li>- Bell's palsy</li> <li>- Guillain-Barré syndrome (GBS)</li> <li>- Vaccine-induced hyperinflammation</li> <li>- Other adverse vaccination reactions including herpes zoster</li> </ul> Included symptoms ( $\geq 3$ ):<br><ul style="list-style-type: none"> <li>- Immunological/ rheumatological disorders (e.g. myalgia, joint pain, swollen/painful lymph nodes)</li> <li>- Cardiovascular disorder (e.g. orthostatic intolerance, arrhythmia, sinus tachycardia, palpitations)</li> <li>- Neurologic disorder (e.g. cognitive impairment, peripheral nerve dysfunction, sensomotor paresis)</li> <li>- Other consensus symptoms of ME/CSF [7]</li> </ul> |
|               | Exclusion:<br>Potentially confounding chronic medication pre- and post-vaccination<br><ul style="list-style-type: none"> <li>- anti-psychotic, anti-depressive</li> <li>- immunosuppressive, anti-proliferative, anti-inflammatory</li> <li>- anti-biotic</li> <li>- immunomodulative treatment after vaccination</li> </ul> Potentially confounding health condition existing before vaccination<br><ul style="list-style-type: none"> <li>- immunological disease (e.g. Post-COVID, Long-COVID, rheumatic disease)</li> <li>- musculoskeletal disease (e.g. ME/CFS, Fibromyalgia, Complex regional pain syndrome)</li> <li>- neurological disease (e.g. Multiple Sclerosis, Neuromyelitis Optica spectrum disorders, GBS, Chronic inflammatory demyelinating polyneuropathy (CIPD), Polyneuropathy other origin than CIPD)</li> <li>- Psychiatric disorder (e.g. Depression, Anxiety disorder, Post-traumatic stress disorder, Obsessive compulsive disorder)</li> <li>- Malignancies, transplantations</li> </ul> Symptoms following other vaccination (incl. non-mRNA SARS-CoV-2 vaccination)                                                                                                                                                                                                                                                                                                                                                                                                                                                                                                                                                                                                                                    |

<sup>1</sup>By a physician in hospital or general practice

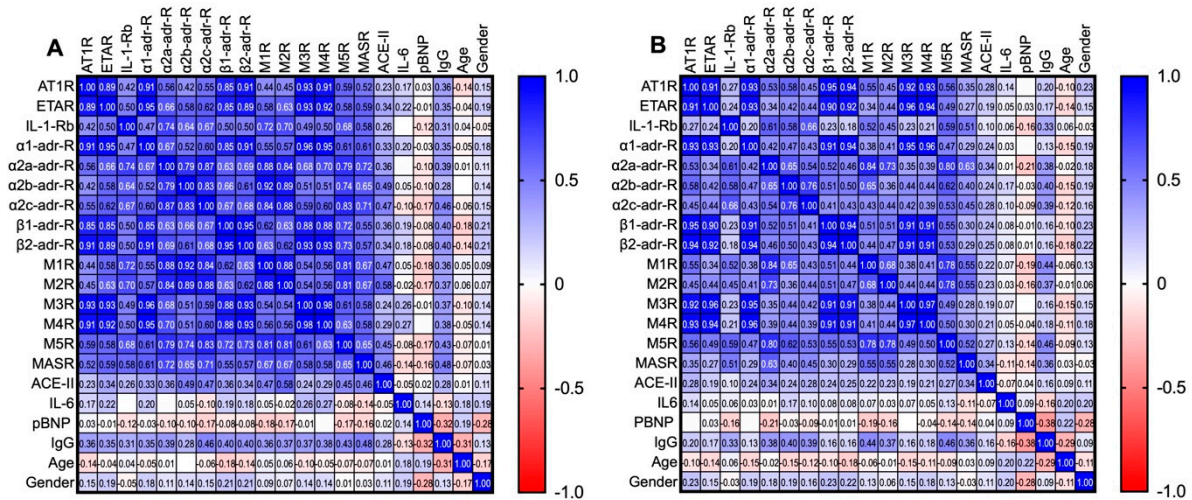

**Figure S1. Co-variance of Receptor Antibodies in Serum of healthy Volunteers (n=89):** Age, gender and serum values determined 48 h before first (A) and 6 months after second (B) SARS-CoV-2 vaccination (Spikevax, Moderna). Numerical values: Spearmans's R, values  $\geq 0.7$  considered significant ( $p < 0.0001$ ).

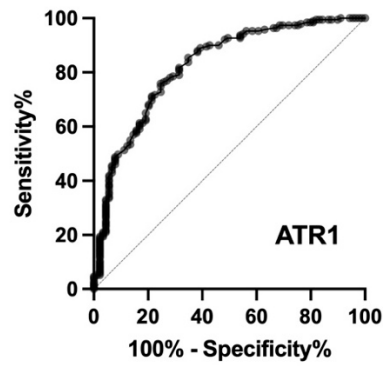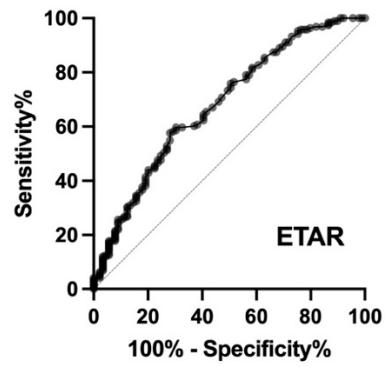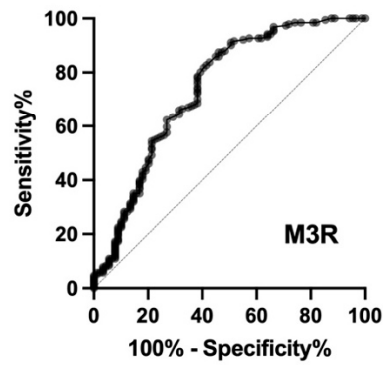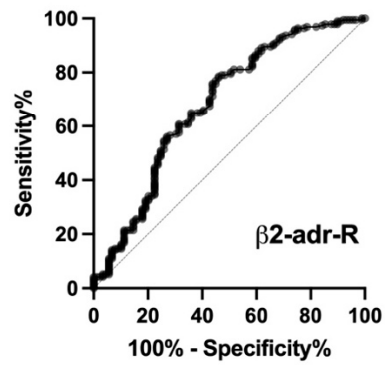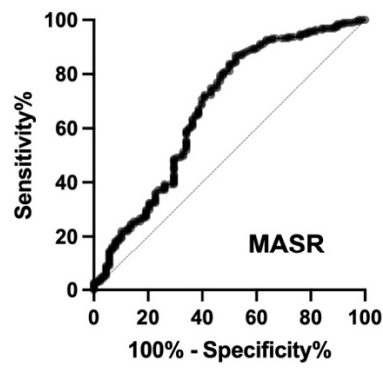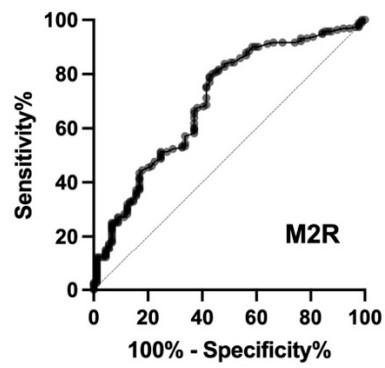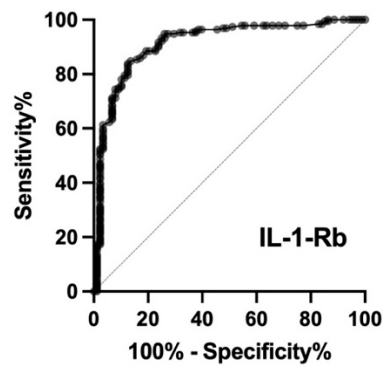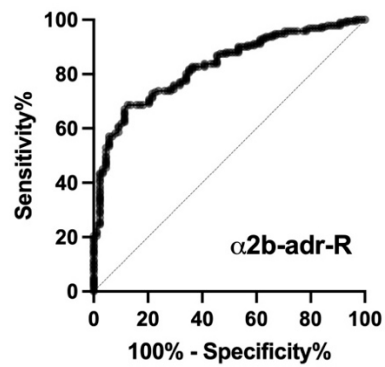

Figure S2. ROC curves of Receptor Antibodies discriminating PACVS Subjects from post-Vaccination Controls

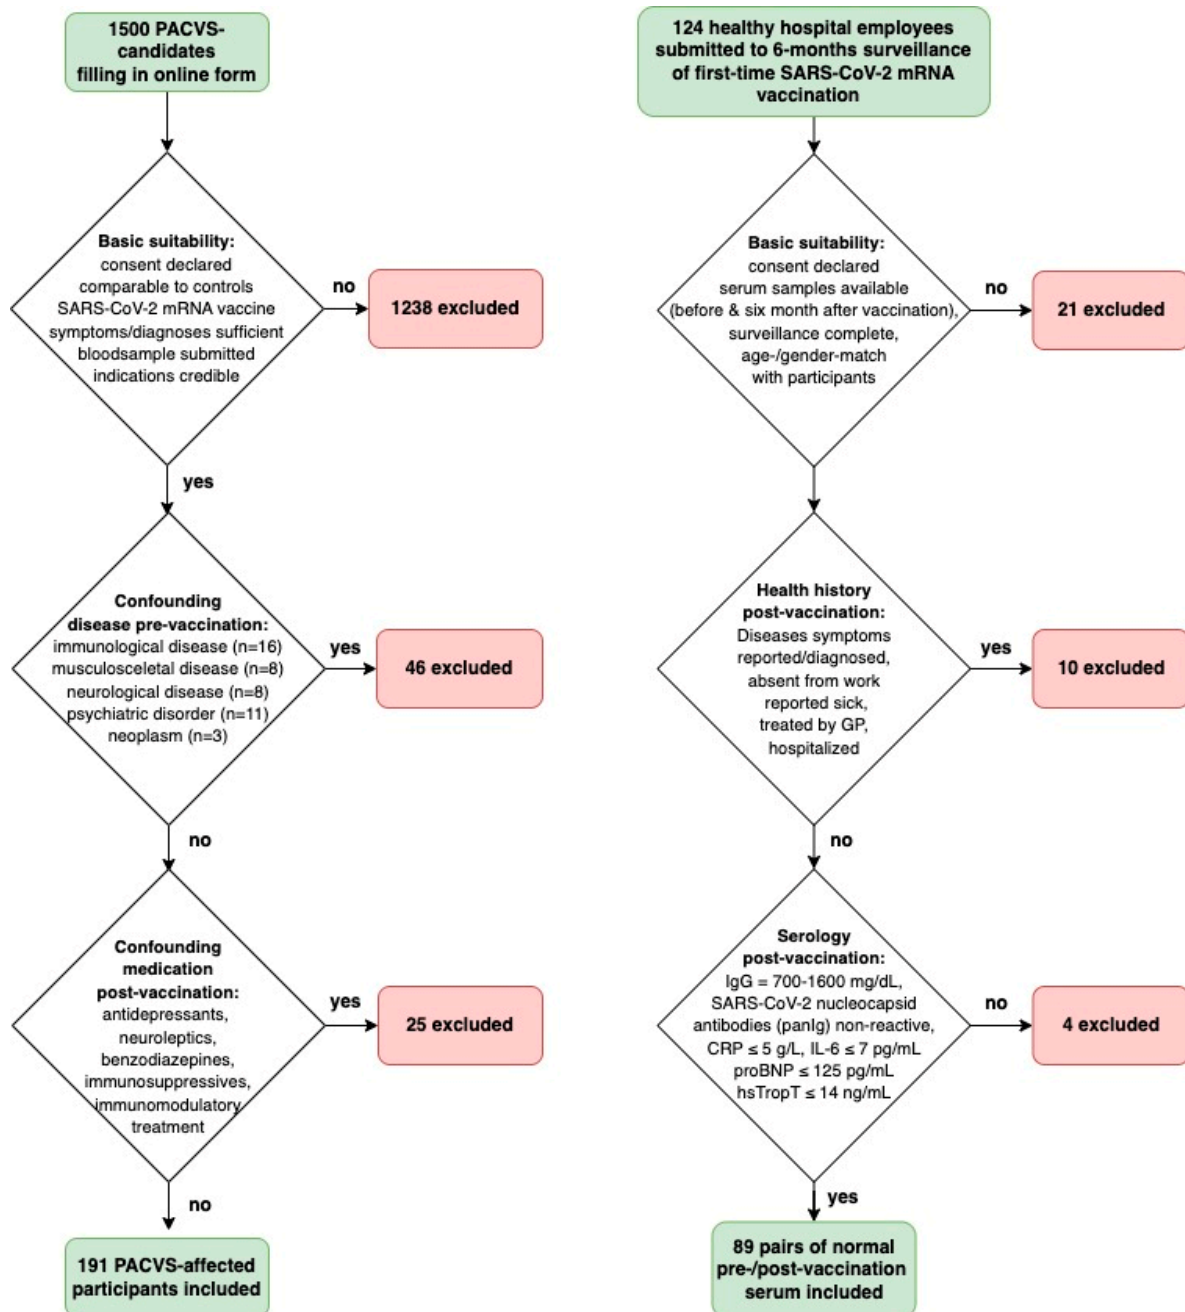

**Figure S3. Flow charts of inclusion of study participants (left) and controls (right).** In-/exclusion criteria are listed in Table S2. Serological surveillance of healthy hospital employees used as source for controls as described in [37].
